# Supplementary material for: RETRACTED: A transcriptional signature associated with non-Hodgkin lymphoma in the blood of patients with Q fever
Source: PubMed Central journal article supplement (PMC6557487; doi:10.1371/journal.pone.0217542), 2019-06-10
Supplement: pone.0217542.s007.pdf [file pone.0217542.s007.pdf]

## SUPPLEMENTARY DATA

**Supplementary table 1. Specific primers used to perform qRT-PCR**

| Gene symbol     | Foward                  | Reverse                 |
|-----------------|-------------------------|-------------------------|
| AIF1            | ccccatccctatccatagtctct | cccatcatcccctttcccttca  |
| BAG1            | cttctcaggagtgcacatgtgct | aatgggggtttgctatgttgc   |
| BCL2L11         | acttcaccagcaccatagaag   | cctgactcttcttgggtctcc   |
| CASP2           | tctcaacttgcctgaagag     | ggagcttctgtaaaggggaca   |
| CASP4           | ttaagggtgtggaatccctggg  | ctgccatacgttcttctcttg   |
| CASP8           | tcaacaagagcctgctgaagat  | cctgtccctaatgctgtgaagt  |
| CNTRL           | agttccagccatagtccag     | tctccactgtctgcatctcta   |
| CREBBP          | atcgaaccaaagctctgtttgc  | cgtggccggaagaaatgaatac  |
| FYN             | gacagaacattcccatcccact  | tggctaaaacatgctggagtact |
| G6PD            | acagagtgagcccttctcaag   | atgcaggactcgtgaatgttct  |
| IL13RA1         | tagatggccatgaagaggatgc  | ccaagacctagggatcacaacc  |
| IL2RG           | cccatgttacaccctaaagcct  | ggaaagaggaaggaggaggaaag |
| JAK3            | ttcagtttccacctgtccaa    | caaggggtaagctctgaccatt  |
| KIAA1551        | gcctccccaagtaaaggatcaa  | catccttccgttcttccacaga  |
| LIG3            | ctcatacagctgacgggatctc  | agtactcagcttcccttctgc   |
| MAP3K8          | gagctgtggaccaatgagagaa  | atgtctgctttggttgaatggc  |
| MIR17HG         | tggaacagtgtgataggaagcc  | ccacagatcactaccaaaccca  |
| NFKBIA          | gtattctcctaccagctcac    | ccatgttcttccagccccttg   |
| OGG1            | agatgttaccctggctcaactg  | gaagccatggtagggtgacatca |
| REL             | tctgacttctgaaatgcctcc   | acataggcaagcagctgtgagg  |
| SP100           | atgtccactgcagcactattca  | tccaccctcaagtagaccctag  |
| TGFB1           | taaagggtgaggaaacaagccca | tggctcaaatgcctggattca   |
| TLR7            | cgaaacctaccctcaccattaa  | tgggtttaatctgcagcctctt  |
| TRAF1           | ctcactcacctcagtaacccc   | caggtgttacgggattctggaa  |
| EXOC2           | cctcctcctgtgttttaggttg  | ccaggatctcatcttggatctc  |
| MYC             | gttgttgetgatctgtctcagg  | ggtcagagtctggatcaccttc  |
| NCOA1-variant 3 | ttggcagtaggagaaggagaag  | accacaacagtagaaggaggaga |
| NCOA1-variant 1 | ttggcagtaggagaaggagaag  | accacaacagtagaaggaggaga |

|            |                        |                       |
|------------|------------------------|-----------------------|
| PVT1       | ggaaatgagtctgtgtggtga  | gggctaaatctggtgagtgtc |
| CXCR5      | gtgaccagcagaggaagaagat | agattctcttcgccaagtcag |
| ETS1       | ggcaggttaatgtgtaaaacc  | gagatgccttaacctttgttg |
| LPP        | gtcacctctacatgccaatgaa | gtgtcttcttgaggaaacctc |
| BCL2-alpha | caatcagggttaaggtactgg  | ggaggaaaagagttggaactt |
