# Supplementary material for: RETRACTED: A transcriptional signature associated with non-Hodgkin lymphoma in the blood of patients with Q fever
Source: PubMed Central journal article supplement (PMC6557487; doi:10.1371/journal.pone.0217542), 2019-06-10
Supplement: pone.0217542.s008.pdf [file pone.0217542.s008.pdf]

**Supplementary table 2. List of genes modulated in acute Q fever**

| <b>Gene modulated in acute Q fever patients</b> |                         |                      |                    |
|-------------------------------------------------|-------------------------|----------------------|--------------------|
| <b>Gene symbol</b>                              | <b>Gene name</b>        | <b>Exp log ratio</b> | <b>Exp -pvalue</b> |
| BCL9                                            | B-cell CLL/lymphoma 9   | -2.490               | 4.11E-05           |
| BCL11A                                          | B-cell CLL/lymphoma 11A | 1.458                | 2.44E-05           |
| BCL2L11                                         | BCL2 like 11            | 1.397                | 2.23E-04           |
| BCL7A                                           | BCL tumor suppressor 7A | 2.336                | 1.84E-04           |
